# Supplementary material
Source: HighWire-hosted journal article supplement (https://openheart.bmj.com/content/6/1/e000955)
Supplement: inline-supplementary-material-1 [file inline-supplementary-material-1.docx]

**Supplemental Table 1:** Locations of the peripheral artery lesions.

| **Peripheral artery** | **Number of patients with ≥50% stenosis** |
| --- | --- |
| Carotid | 10 |
| Subclavian | 9 |
| renal | 20 |
| Common internal iliac | 29 |
| External iliac artery | 37 |
| Internal iliac artery | 28 |
| Common femoral artery | 28 |
| Profunda femoris artery | 18 |
| Superficial femoral artery | 79 |
| Popliteal artery | 33 |
| Tibioperoneal artery | 15 |
| Anterior tibial artery | 36 |
| Posterior tibial artery | 24 |
